# Supplementary material for: Heatwave Effects on the Photosynthesis and Antioxidant Activity of the Seagrass Cymodocea nodosa under Contrasting Light Regimes
Source: MDPI journal article supplement (doi:10.3390/oceans2030025), 2021-06-25
Supplement: s1 [file s1]

**Table S1.** Effects of temperature (20 °C and 40 °C) and light (150 and 450  $\mu\text{mol quanta m}^{-2}\text{s}^{-1}$ ) on *Cymodocea nodosa* photosynthetic pigments ( $\mu\text{mol/gDW}$ ). Values represent mean  $\pm$  SE ( $n = 3$ ); l indicate significant differences among light levels under the same temperature ( $p < 0.05$ , SNK test); t indicate significant differences among temperatures under the same light level ( $p < 0.05$ , SNK test); capital T and L indicate differences among one factor (respectively temperature and light) independently of the other; L\*T indicate interaction among factors ( $p < 0.05$ , SNK test). No letters indicate no significant differences (or no significant interaction among factors in two-way ANOVA).

| Photosynthetic pigment<br>( $\mu\text{mol gDW}^{-1}$ ) | Statistics<br>( $p < 0.05$ ) | Light<br>( $\mu\text{mol quanta/m}^2\text{s}^{-1}$ ) | Temperature (°C)   |                    |
|--------------------------------------------------------|------------------------------|------------------------------------------------------|--------------------|--------------------|
|                                                        |                              |                                                      | 20 °C              | 40 °C              |
| Chlorophyll <i>a</i>                                   |                              | 150                                                  | 1.20 $\pm$ 0.21    | 1.55 $\pm$ 0.29    |
|                                                        |                              | 450                                                  | 1.08 $\pm$ 0.20    | 1.44 $\pm$ 0.12    |
| Chlorophyll <i>b</i>                                   | T                            | 150                                                  | 0.37 $\pm$ 0.06    | 0.74 $\pm$ 0.09    |
|                                                        |                              | 450                                                  | 0.40 $\pm$ 0.05    | 0.82 $\pm$ 0.09    |
| Total Chlorophyll (ChlT)                               | T                            | 150                                                  | 1.57 $\pm$ 0.26    | 2.28 $\pm$ 0.39    |
|                                                        |                              | 450                                                  | 1.47 $\pm$ 0.25    | 2.26 $\pm$ 0.21    |
| Chl <i>a</i> /Chl <i>b</i>                             | T, L                         | 150                                                  | 3.27 $\pm$ 0.14    | 2.07 $\pm$ 0.13    |
|                                                        |                              | 450                                                  | 2.67 $\pm$ 0.17    | 1.77 $\pm$ 0.09    |
| Chl <i>a</i> /Chl T                                    | T,L                          | 150                                                  | 0.77 $\pm$ 0.01 t  | 0.67 $\pm$ 0.01    |
|                                                        |                              | 450                                                  | 0.73 $\pm$ 0.01 t  | 0.64 $\pm$ 0.01    |
| Chl <i>b</i> /Chl T                                    | T,L                          | 150                                                  | 0.23 $\pm$ 0.01 t  | 0.33 $\pm$ 0.01    |
|                                                        |                              | 450                                                  | 0.27 $\pm$ 0.01 t  | 0.36 $\pm$ 0.01    |
| Neoxanthin                                             |                              | 150                                                  | 0.04 $\pm$ 0.01    | 0.08 $\pm$ 0.03    |
|                                                        |                              | 450                                                  | 0.04 $\pm$ 0.01    | 0.06 $\pm$ 0.02    |
| Lutein                                                 |                              | 150                                                  | 0.15 $\pm$ 0.02    | 0.24 $\pm$ 0.07    |
|                                                        |                              | 450                                                  | 0.16 $\pm$ 0.03    | 0.17 $\pm$ 0.04    |
| $\beta$ -Carotene                                      |                              | 150                                                  | 0.25 $\pm$ 0.02    | 0.23 $\pm$ 0.07    |
|                                                        |                              | 450                                                  | 0.18 $\pm$ 0.05    | 0.18 $\pm$ 0.04    |
| Violaxanthin (V)                                       | L                            | 150                                                  | 0.16 $\pm$ 0.03    | 0.18 $\pm$ 0.06    |
|                                                        |                              | 450                                                  | 0.09 $\pm$ 0.03    | 0.07 $\pm$ 0.02    |
| Antheraxanthin (A)                                     | T                            | 150                                                  | 0.07 $\pm$ 0.02    | 0.02 $\pm$ 0.01    |
|                                                        |                              | 450                                                  | 0.06 $\pm$ 0.02    | 0.05 $\pm$ 0.01    |
| Zeaxanthin (Z)                                         | L                            | 150                                                  | 0.03 $\pm$ 0.01    | 0.008 $\pm$ 0.008  |
|                                                        |                              | 450                                                  | 0.05 $\pm$ 0.01    | 0.044 $\pm$ 0.012  |
| V+A+Z                                                  |                              | 150                                                  | 0.26 $\pm$ 0.05    | 0.21 $\pm$ 0.06    |
|                                                        |                              | 450                                                  | 0.21 $\pm$ 0.06    | 0.16 $\pm$ 0.04    |
| Total carotenoids (CarT)                               |                              | 150                                                  | 0.71 $\pm$ 0.11    | 0.77 $\pm$ 0.24    |
|                                                        |                              | 450                                                  | 0.59 $\pm$ 0.14    | 0.58 $\pm$ 0.13    |
| CarT/ChlT (mmol/mol)                                   | T                            | 150                                                  | 451.33 $\pm$ 16.00 | 331.06 $\pm$ 72.15 |
|                                                        |                              | 450                                                  | 383.38 $\pm$ 38.90 | 248.70 $\pm$ 40.45 |
